## CORRECTION

# Correction: Audiograms of three subterranean rodent species (genus *Fukomys*) determined by auditory brainstem responses reveal extremely poor high-frequency cut-offs

**Patricia Gerhardt, Yoshiyuki Henning, Sabine Begall and E. Pascal Malkemper**

There was an error published in *J. Exp. Biol.* **220**, 4377-4382.

The title was incorrect. The corrected title is below.

Audiograms of three subterranean rodent species (genus *Fukomys*) determined by auditory brainstem responses reveal extremely poor high-frequency hearing

We apologise to the authors and readers for any inconvenience this may have caused.
